# Supplementary material for: Interpersonal touch interventions for patients in intensive care: A design‐oriented realist review
Source: PubMed Central journal article supplement (PMC6419112; doi:10.1002/nop2.200), 2018-10-24

## Appendix S4: Document flow diagram for supplementary systematic search

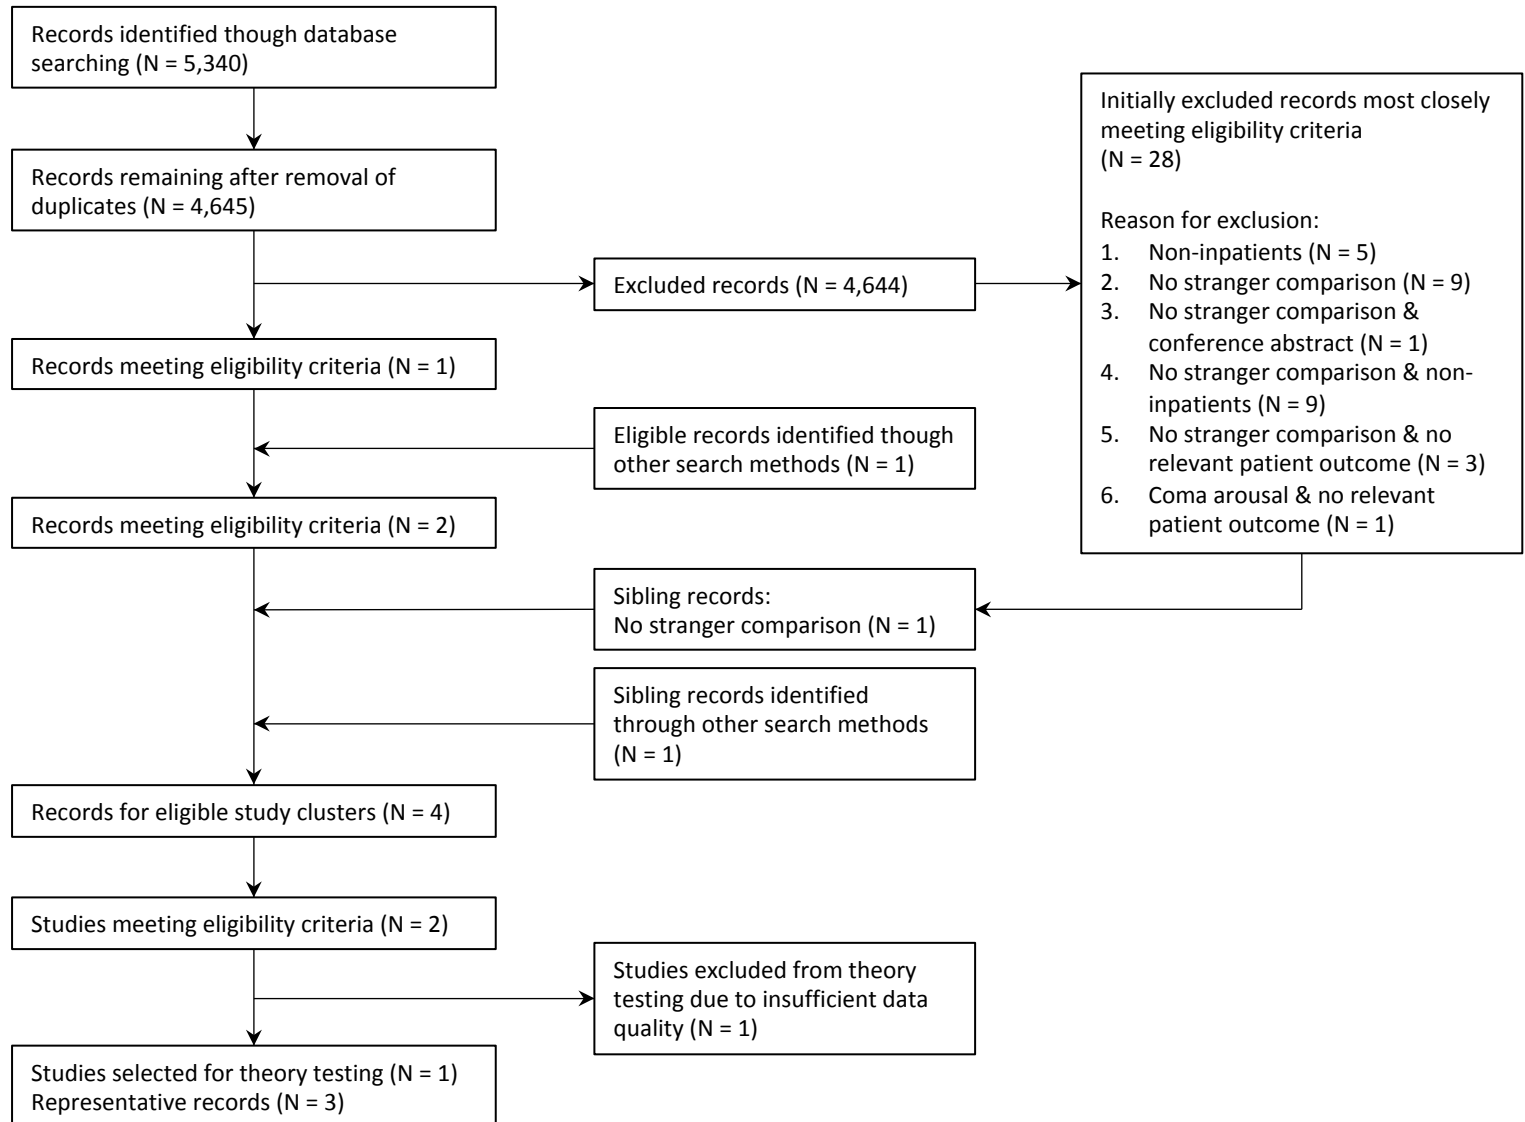

Supplement: NOP2-6-216-s004.pdf [file NOP2-6-216-s004.pdf]
